# Supplementary material
Source: PubMed Central journal article supplement (PMC10411242)
Supplement: 10-1055-s-0041-1731433-s2100023.pdf [file 10-1055-s-0041-1731433-s2100023.pdf]

**Supplementary Table S1** Univariable analysis of risk factors for failure of NIV

| Vital sign                                             | NIV success        | NIV failure        | p-Value |
|--------------------------------------------------------|--------------------|--------------------|---------|
| Heart rate                                             |                    |                    |         |
| At initiation                                          | 132 (116, 153)     | 150.5 (130, 162)   | 0.02    |
| Percent change from initiation to +1–2 hour            | –2.6 (–11.1, 2.2)  | –3.5 (–9.9, 3.6)   | 0.90    |
| Percent change from initiation to +6 hour              | –7.0 (–18.2, 1.5)  | –0.7 (–12.6, 4.7)  | 0.23    |
| Respiratory rate                                       |                    |                    |         |
| At initiation                                          | 35 (25.5, 50)      | 38 (25, 60.5)      | 0.35    |
| Percent change from initiation to +1–2 hour            | –15.8 (–30.3, 0.0) | 2.38 (–24.6, 7.6)  | 0.15    |
| Percent change from initiation to +6                   | –18.5 (–40.3, 0.0) | 8.0 (–25.6, 21.6)  | 0.06    |
| SpO <sub>2</sub>                                       |                    |                    |         |
| At initiation                                          | 99.0 (96.0, 100.0) | 99.0 (95.0, 100.0) | 0.65    |
| Percent change from initiation to +1–2 hour            | 0.0 (–1.0, 1.0)    | 0.0 (–0.5, 1.0)    | 0.69    |
| Percent change from initiation to +6 hour              | 0.0 (–1.0, 2.0)    | 0.0 (–4.0, 1.8)    | 0.34    |
| FiO <sub>2</sub>                                       |                    |                    |         |
| At initiation                                          | 0.5 (0.3, 0.6)     | 0.6 (0.45, 1.0)    | 0.01    |
| Percent change from initiation to +1–2 hour            | 0.0 (0.0, 0.0)     | 0.0 (0.0, 0.0)     | 0.74    |
| Percent change from initiation to +6 hour              | –12.5 (–30.0, 0.0) | –19.4 (–26.3, 0.0) | 0.56    |
| SpO <sub>2</sub> :FiO <sub>2</sub> ratio               |                    |                    |         |
| SpO <sub>2</sub> :FiO <sub>2</sub> ratio at initiation | 290.0 (143.8, 310) | 158.3 (89, 194)    | 0.06    |
| Percent change from initiation to +1–2 hour            | 1.1 (1.0, 4.3)     | –1.5 (–30.8, 31.0) | 0.69    |
| Percent change from initiation to +6 hour              | 3.2 (0.0, 50.4)    | –4.0 (–37.0, 29.9) | 0.19    |

Abbreviations: FiO<sub>2</sub>, fraction of inspired oxygen; NIV, noninvasive ventilation; SpO<sub>2</sub>, saturation from pulse oximetry.

Note: Continuous variables are presented as medians with (interquartile ranges) and p-values are from Mann–Whitney U-tests. Variables presented as percent change from initial. Negative percent change denotes a decrease in that variable (i.e., an improvement in heart rate or respiratory rate but worsening SpO<sub>2</sub>:FiO<sub>2</sub>).
